# Supplementary material for: Transcriptome-Wide Binding Sites for Components of the Saccharomyces cerevisiae Non-Poly(A) Termination Pathway: Nrd1, Nab3, and Sen1
Source: PLoS Genet. 2011 Oct 20;7(10):e1002329. doi: 10.1371/journal.pgen.1002329 (PMC3197677; doi:10.1371/journal.pgen.1002329)
Supplement: Table S2 — The top 100 Nab3 cross-linked sites. (XLSX) [file pgen.1002329.s008.xlsx]

## Sheet: Sheet1
Nab3 Top 100 Cross-linked Sites
CHROMOSOME	START	END	STRAND	READS*	GENE**
chrXIII	626586	626686	+	257.295	snR83
chrXV	759394	759263	-	158.905	snR35
chrX	139736	139512	-	153.518	snR128
chrII	101206	101088	-	125.596	PRX1
chrXIV	89082	89218	+	123.122	snR40
chrXIV	89325	89518	+	121.099	snR40
chrXII	233990	233924	-	117.299	PDC1
chrX	663751	663964	+	112.18	YJR127C
chrX	139971	139869	-	105.401	snR190
chrX	663968	664139	+	99.086	snR3
chrXI	38660	39016	+	97.86	snR64
chrXV	759521	759494	-	96.969	snR35
chrXV	408122	408101	-	94.586	snR9
chrXIV	234285	234400	+	90.754	ADE12
chrVII	346072	346188	+	79.309	snR10
chrXVI	821741	821876	+	77.759	snR45
chrXIV	661529	661493	-	75.646	ACC1
chrXIV	89220	89301	+	75.587	snR40
chrV	424860	424955	+	71.259	snR4
chrIII	178809	178669	-	66.72	snR189
chrVIII	411074	411233	+	66.446	snR71
chrXVI	821878	822048	+	65.906	snR45
chrXIV	174603	174490	-	64.706	NRD1
chrXV	842410	842527	+	62.638	snR31
chrII	681865	681802	-	60.023	LSR1
chrV	424796	424837	+	58.964	snR4
chrV	431375	431343	-	58.268	snR52
chrVIII	294300	294329	+	56.954	HXT5
chrII	88139	88343	+	56.641	snR56
chrVII	316958	317075	+	55.133	snR82
chrIV	541813	541714	-	54.122	snR47
chrV	431246	431131	-	52.316	snR52
chrXIII	652683	652749	+	51.257	snR11
chrIV	1402999	1403127	+	49.083	snR13
chrVII	801819	801686	-	48.977	PTI1
chrVII	366445	366345	-	48.178	snR39b
chrXIII	652288	652343	+	48.03	snR11
chrXIV	174343	174225	-	48.03	NRD1
chrIV	323664	323541	-	46.161	snR63
chrV	442254	442307	+	45.959	SCR1
chrXII	265122	265036	-	45.191	YLR063W
chrIII	142435	142328	-	44.928	snR33
chrX	136398	136330	-	44.745	SNA3
chrXII	388767	388936	+	44.47	YPS3
chrXV	832318	832502	+	44.367	snR8
chrIX	177442	177379	-	44.164	XBP1
chrVII	365230	365169	-	43.946	snR39b
chrX	140129	140003	-	43.918	snR190
chrXIV	230323	230212	-	43.683	snR19
chrV	15981	15835	-	43.188	DLD3
chrX	620637	620725	+	41.828	URA8
chrV	545038	544947	-	41.778	BMH1
chrVIII	381589	381748	+	41.244	snR32
chrXVI	719679	719751	+	41.058	snR41
chrXIII	652509	652680	+	40.956	snR11
chrV	431325	431259	-	40.571	snR52
chrXV	780523	780603	+	40.276	snR17a
chrXVI	882760	882717	-	39.868	YPR170W-B
chrVII	366613	366460	-	39.38	snR39B
chrVII	802395	802531	+	39.195	CHO2
chrXV	259347	259435	+	38.503	snR50
chrXVI	719060	718970	-	37.027	snR70
chrIV	556497	556411	-	36.913	TPI1
chrXV	842170	842009	-	36.44	snR5
chrIII	137752	137793	+	35.504	PGK1
chrIV	1468330	1468273	-	34.944	GNP1
chrXV	759484	759403	-	34.87	snR35
chrXIII	626236	626324	+	34.797	snR83
chrIX	382115	382022	-	34.717	RPR2
chrVII	56145	56032	-	34.553	ADE5,7
chrXV	259444	259563	+	34.513	snR50
chrXII	199220	199356	+	34.225	snR30
chrXV	408096	407954	-	33.998	snR9
chrIII	107740	107612	-	33.914	snR43
chrIII	177070	177138	+	33.862	snR65
chrXIV	480655	480561	-	33.704	NIS1
chrII	307264	307186	-	33.697	snR161
chrX	349375	349260	-	33.591	snR60
chrIX	381940	381871	-	33.53	RPR2
chrX	173008	172959	-	33.493	URA2
chrII	370180	370264	+	33.003	NRG2
chrIX	97103	97205	+	32.147	snR68
chrVII	609585	609698	+	31.78	snR48
chrXIII	297293	297389	+	31.183	snR77
chrV	460542	460631	+	31.169	FTR1
chrXVI	901529	901500	-	30.969	DPM1
chrXI	326050	326000	-	30.778	FBA1
chrVII	545295	545378	+	30.416	snR46
chrXIV	230195	230102	-	30.339	snR19
chrXV	842665	842768	+	30.227	snR5
chrXI	463511	463551	+	30.162	PRY2
chrXIV	722023	721948	-	29.961	snR191
chrVII	354731	354647	-	29.721	SCY1
chrXVI	718869	718782	-	29.66	snR51
chrXII	460408	460504	+	29.653	NTS2-1
chrX	526755	526680	-	29.557	CYC1
chrXVI	861846	861942	+	29.401	GPH1
chrV	441992	442055	+	29.332	SCR1
chrVII	280466	280353	-	29.194	NAB2
chrXII	856679	856783	+	28.504	snR44
* The median number of sequence reads/107 reads averaged over a peak derived using the peak finding utility in MochiView.
** The annotated gene closest to the peak. The peak of reads can be either sense or antisense to the indicated gene. In some cases the peak is located upstream or downstream of the ORF.
